# Supplementary material
Source: HighWire-hosted journal article supplement (https://www.cmaj.ca/highwire/filestream/106436/field_highwire_adjunct_files/1/210842-res-2-at.pdf)
Supplement: 210842-res-2-at.pdf [file 210842-res-2-at.pdf]

**ARIMA Model Summary Table**

| Measure                             | ARIMA Model           | AIC    | BIC    | R-square | November 2009 Ramp Intervention |                           | September 2016 Ramp Intervention |                           | March 2018 Ramp Intervention |                           |
|-------------------------------------|-----------------------|--------|--------|----------|---------------------------------|---------------------------|----------------------------------|---------------------------|------------------------------|---------------------------|
|                                     |                       |        |        |          | p-value                         | estimate (standard error) | p-value                          | estimate (standard error) | p-value                      | estimate (standard error) |
| Accidental Toxicity Rates (monthly) | (13,1,0) no intercept | -736.3 | -684.3 | 0.53     | 0.23                            | 0.00056 (0.00046)         | 0.70                             | -0.00048 (0.00123)        | 0.22                         | -0.0020 (0.00160)         |
| ICU Admission Rates (quarterly)     | (5,1,0) no intercept  | -290.6 | -273.5 | 0.54     | 0.22                            | 0.00165 (0.00134)         | 0.22                             | -0.00451 (0.00365)        | 0.77                         | 0.00138 (0.00477)         |
| Opioid Poisoning Rates (quarterly)  | (3,1,0) no intercept  | -307.1 | -294.3 | 0.85     | 0.30                            | 0.00181 (0.00173)         | 0.87                             | -0.00072 (0.00441)        | 0.07                         | -0.10136 (0.00551)        |

## Model Diagnostics for Accidental Toxicity Rates (ARIMA [13,1,0] no intercept)

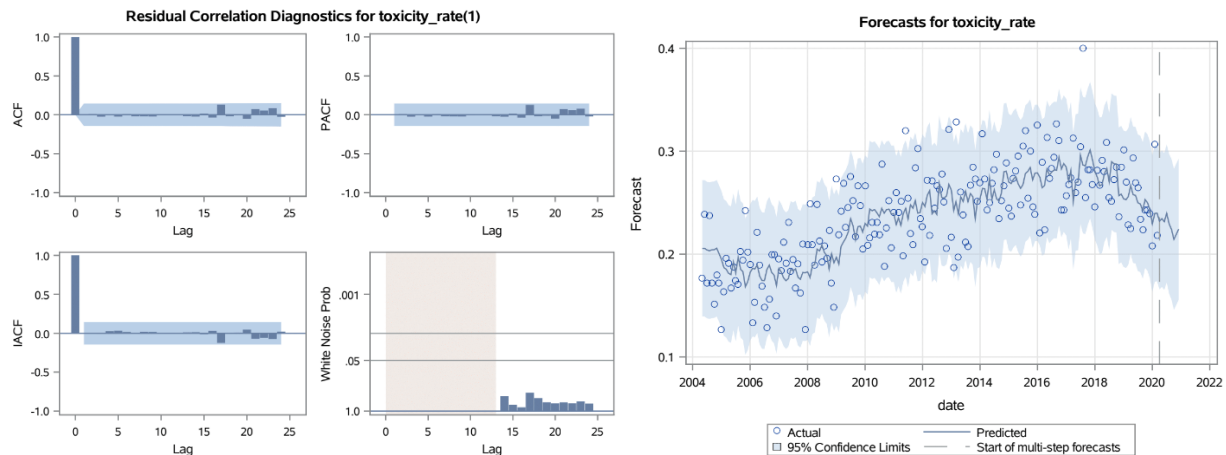

## Model Diagnostics for ICU Admission Rates (ARIMA [5,1,0] no intercept)

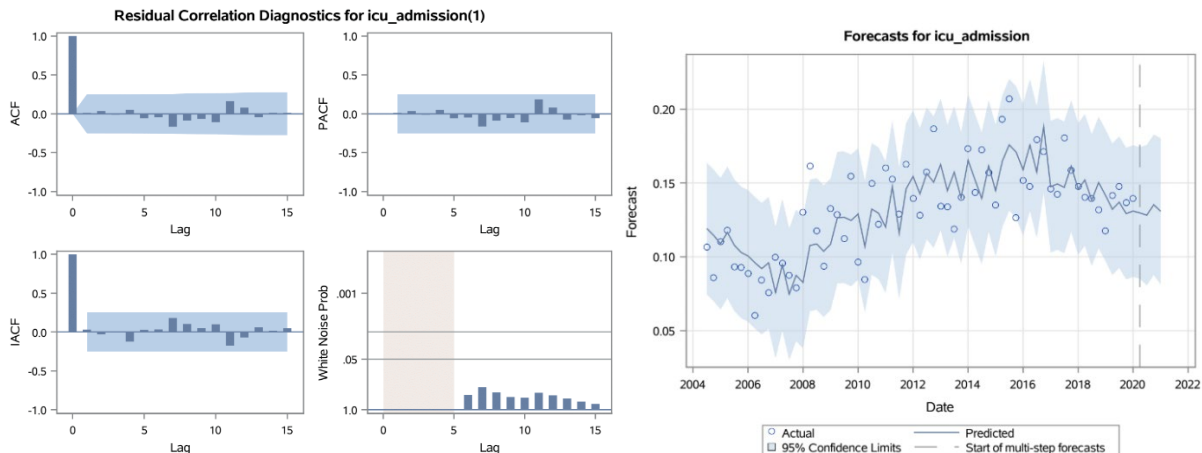

## Model Diagnostics for Opioid Poisoning Rates (ARIMA [3,1,0] no intercept)

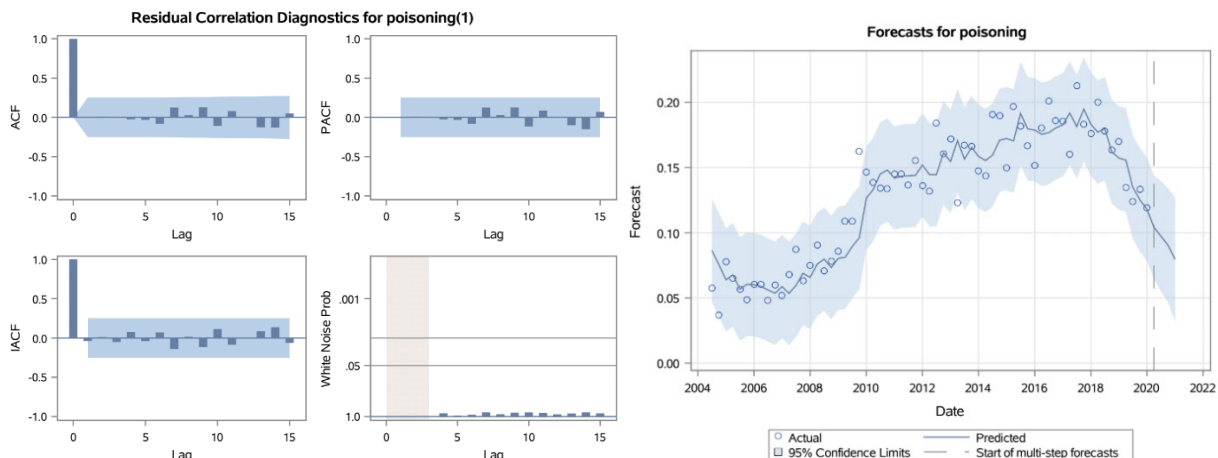

Appendix 2, as submitted by the authors. Appendix to: Antoniou T, Guan Q, Martins D, et al. Impact of acetaminophen product labelling changes in Canada on hospital admissions for accidental acetaminophen overdose: a population-based study. *CMAJ* 2022. doi: 10.1503/cmaj.210842. Copyright © 2022 The Author(s) or their employer(s). To receive this resource in an accessible format, please contact us at [cmajgroup@cmaj.ca](mailto:cmajgroup@cmaj.ca).
